# Supplementary material
Source: HighWire-hosted journal article supplement (https://lupus.bmj.com/content/suppl/2020/10/12/7.1.e000419)
Supplement: lupus-2020-000419supp001_data_supplement.pdf [file lupus-2020-000419supp001_data_supplement.pdf]

## Supplementary table 1 A-B: Correlations of the domains of the LFA-REAL ClinRo and LFA-REAL PRO

## A. Correlations of the domains of the LFA-REAL ClinRo and LFA-REAL PRO (mucocutaneous, musculoskeletal and cardiorespiratory domains)

| LFA-REAL PRO                      | LFA-REAL ClinRO      |         |
|-----------------------------------|----------------------|---------|
|                                   | Rho                  | p-value |
|                                   | Global mucocutaneous |         |
| Rash                              | 0.023                | 0.727   |
|                                   | Rash                 |         |
| Rash                              | 0.120                | 0.071   |
|                                   | Alopecia             |         |
| Alopecia                          | 0.017                | 0.795   |
|                                   | Arthralgia/arthritis |         |
| Global arthritis                  | 0.271                | <0.001  |
| Arthritits, sum of all subdomains | 0.289                | <0.001  |
|                                   | Myalgia/myositis     |         |
| Myalgia                           | -0.037               | 0.580   |
| Fatigue                           | 0.052                | 0.433   |
|                                   | Cardiorespiratory    |         |
| Fatigue                           | 0.163                | 0.014   |
| Chest pain                        | 0.240                | <0.001  |
| Shortness of breath               | 0.289                | <0.001  |

LFA-REAL: Lupus Foundation of America Rapid Evaluation of Activity in Lupus. ClinRO: Clinician Reported Outcome. PRO: Patient Reported Outcome.

## B. Renal (LFA-REAL ClinRO), swelling in legs (LFA-REAL PRO), proteinuria and serum albumin

|                               | LFA-REAL ClinRO renal |         | Proteinuria |         | Serum albumin |         |
|-------------------------------|-----------------------|---------|-------------|---------|---------------|---------|
|                               | Rho                   | p value | Rho         | p value | Rho           | p value |
| LFA-REAL PRO swelling in legs | 0.107                 | 0.108   | 0.095       | 0.181   | -0.197        | 0.003   |
| Proteinuria                   | 0.738                 | <0.001  | -0.360      | <0.001  |               |         |
| Serum albumin                 | -0.250                | <0.001  |             |         | -0.360        | <0.001  |

LFA-REAL: Lupus Foundation of America Rapid Evaluation of Activity in Lupus. ClinRO: Clinician Reported Outcome. PRO: Patient Reported Outcome.

Supplementary Table 2. Correlation between SLEDAI-2K and LFA-REAL ClinRO domains

|                 | LFA-REAL ClinRO |         |
|-----------------|-----------------|---------|
|                 | Rho             | p-value |
| Mucocutaneous   |                 |         |
| SLEDAI-2K       | 0.695           | <0.001  |
| Musculoskeletal |                 |         |
| SLEDAI-2K       | 0.647           | <0.001  |
| Renal           |                 |         |
| SLEDAI-2K       | 0.821           | <0.001  |
| Hematologic     |                 |         |
| SLEDAI-2K       | 0.716           | <0.001  |

SLEDAI-2K: Systemic lupus erythematosus disease activity index 2000. LFA-REAL: Lupus Foundation of America Rapid Evaluation of Activity in Lupus. ClinRO:

Supplementary Table 3: Correlation between LFA-REAL ClinRO and the PGA, the SLEDAI-2K and clinical SLEDAI-2K according to the degree of disease activity

|                                  | LFA-REAL<br>ClinRO<br>0-1400 |         | LFA-REAL<br>ClinRO<br>0-1100 |         |
|----------------------------------|------------------------------|---------|------------------------------|---------|
|                                  | Rho                          | p-value | Rho                          | p-value |
| <i>SLEDAI-2K=0</i>               |                              |         |                              |         |
| PGA                              | 0.443                        | <0.001  | 0.467                        | <0.001  |
| <i>SLEDAI-2K&gt;1<br/>and ≤4</i> |                              |         |                              |         |
| PGA                              | 0.668                        | <0.001  | 0.467                        | <0.001  |
| SLEDAI-2K                        | 0.317                        | 0.003   | 0.333                        | 0.002   |
| Clinical SLEDAI-2K               | 0.617                        | <0.001  | 0.606                        | <0.001  |
| <i>SLEDAI-2K&gt;4</i>            |                              |         |                              |         |
| PGA                              | 0.688                        | <0.001  | 0.720                        | <0.001  |
| SLEDAI-2K                        | 0.473                        | 0.005   | 0.506                        | 0.002   |
| Clinical SLEDAI-2K               | 0.481                        | 0.004   | 0.526                        | 0.001   |

PGA: Physician global assessment. SLEDAI-2K: Systemic lupus erythematosus disease activity index 2000. LFA-REAL: Lupus Foundation of America Rapid Evaluation of Activity in Lupus. ClinRO: Clinician Reported Outcome.

Supplementary Table 4: Correlation between LFA-REAL CPRO and the PGA, the SLEDAI-2K, clinical SLEDAI-2K and LFA-REAL ClinRO according to the degree of disease activity

|                                  | LFA-REAL PRO |         | LFA-REAL PRO |         |
|----------------------------------|--------------|---------|--------------|---------|
|                                  | 0-1200       |         | 0-1000       |         |
|                                  | Rho          | p-value | Rho          | p-value |
| <i>SLEDAI-2K=0</i>               |              |         |              |         |
| PGA                              | 0.163        | 0.094   | 0.197        | 0.042   |
| LFA-REAL ClinRo<br>0-1400        | 0.074        | 0.446   | 0.110        | 0.260   |
| LFA-REAL ClinRo<br>0-1100        | 0.058        | 0.423   | 0.112        | 0.252   |
| <i>SLEDAI-2K&gt;1<br/>and ≤4</i> |              |         |              |         |
| PGA                              | 0.098        | 0.372   | 0.084        | 0.444   |
| SLEDAI-2K                        | 0.105        | 0.337   | 0.090        | 0.412   |
| Clinical SLEDAI-<br>2K           | 0.174        | 0.110   | 0.155        | 0.155   |
| LFA-REAL ClinRo<br>0-1400        | 0.111        | 0.311   | 0.065        | 0.553   |
| LFA-REAL ClinRo<br>0-1100        | 0.083        | 0.446   | 0.029        | 0.723   |
| <i>SLEDAI-2K&gt;4</i>            |              |         |              |         |
| PGA                              | 0.046        | 0.796   | 0.027        | 0.878   |
| SLEDAI-2K                        | 0.004        | 0.982   | -0.027       | 0.881   |
| Clinical SLEDAI-<br>2K           | 0.069        | 0.700   | 0.053        | 0.764   |
| LFA-REAL ClinRo<br>0-1400        | 0.181        | 0.307   | 0.159        | 0.368   |
| LFA-REAL ClinRo<br>0-1100        | 0.222        | 0.206   | 0.201        | 0.254   |

PGA: Physician global assessment. SLEDAI-2K: Systemic lupus erythematosus disease activity index 2000. LFA-REAL: Lupus Foundation of America Rapid Evaluation of Activity in Lupus. ClinRO: Clinician Reported Outcome. PRO: Patient Reported Outcome.
